# Supplementary material
Source: PubMed Central journal article supplement (PMC1323486)

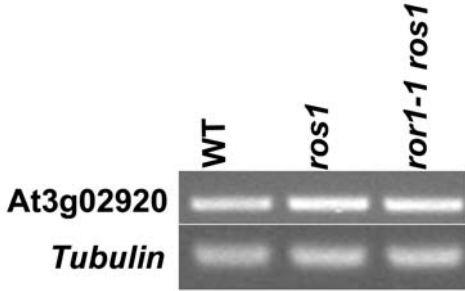

Supplement: plntcell_tpc.105.037507_1.pdf [file plntcell_tpc.105.037507_1.pdf]

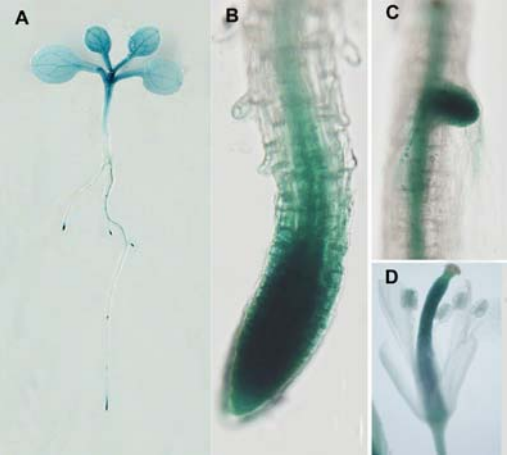

Supplement: plntcell_tpc.105.037507_2.pdf [file plntcell_tpc.105.037507_2.pdf]

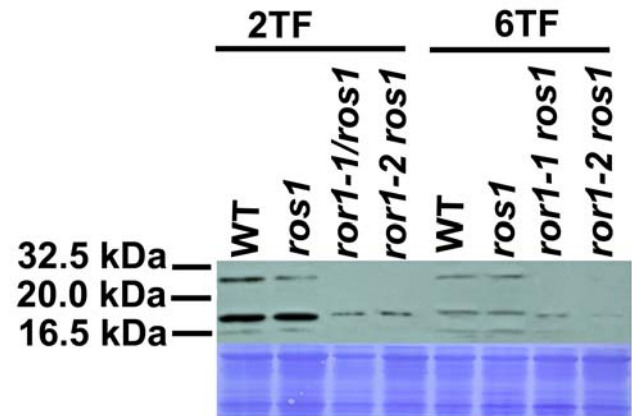

Supplement: plntcell_tpc.105.037507_3.pdf [file plntcell_tpc.105.037507_3.pdf]

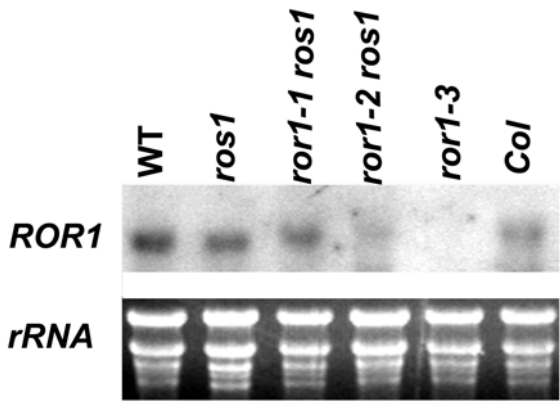

Supplement: plntcell_tpc.105.037507_4.pdf [file plntcell_tpc.105.037507_4.pdf]
